# Supplementary material for: Photoinduced topographical changes on microcrystalline surfaces of diarylethenes
Source: Royal Society of Chemistry journal article supplement (doi:10.1039/c6ce00718j), 2016-01-01
Supplement: c6ce00718j1.pdf [file c6ce00718j1.pdf]

## Supplementary Information

### Photoinduced Topographical Changes on Microcrystalline Surfaces of Diarylethenes: Versatile Shapes Generation Reflecting the Crystal Habit of Derivatives

Noriko Fujinaga,<sup>1</sup> Naoki Nishikawa,<sup>1</sup> Ryo Nishimura,<sup>1</sup> Kengo Hyodo,<sup>1</sup> Seiji Yamazoe,<sup>1,2</sup> Yuko Kojima,<sup>3</sup> Kazuki Yamamoto,<sup>4</sup> Tsuyoshi Tsujioka,<sup>4</sup> Masakazu Morimoto,<sup>5</sup> Satoshi Yokojima,<sup>6</sup> Shinichiro Nakamura,<sup>7</sup> and Kingo Uchida,<sup>1\*</sup>

<sup>1</sup> Department of Materials Chemistry, Faculty of Science and Technology, Ryukoku University, Seta, Otsu 520-2194, Japan,

<sup>2</sup> Department of Chemistry, School of Science, The University of Tokyo, Hongo 7-3-1, Bunkyo-ku, Tokyo, 221-0033, Japan.

<sup>3</sup> MCHC R&D Synergy Center, 1000 Kamoshida, Yokohama 227-8502, Japan,

<sup>4</sup> Department of Arts and Sciences Faculty of Education Osaka Kyoiku University, 4-698-1 Asahigaoka, Kashiwara, Osaka 582-8582 (Japan)

<sup>5</sup> Department of Chemistry and Research Center for Smart Molecules, Rikkyo University, 3-34-1, Nishi-Ikebukuro, Toshima-ku, Tokyo 171-8501, Japan

<sup>6</sup> School of Pharmacy, Tokyo University of Pharmacy and Life Sciences, 1432-1 Horinouchi, Hachioji, Tokyo 192-0392, Japan,

<sup>7</sup> RIKEN Innovation Center, Nakamura Laboratory, 2-1 Hirosawa, Wako, Saitama 351-0198, Japan.

## Table of Contents

|                                                                                                                                                                 |     |
|-----------------------------------------------------------------------------------------------------------------------------------------------------------------|-----|
| 1. DSC curves measured for a mixture of <b>4o</b> and <b>4c</b> .                                                                                               | S3  |
| 2. Absorption spectral changes of <b>4o</b> in hexane solution.                                                                                                 | S4  |
| 3. Thermal stability of <b>4c</b> in decalin solution at elevated temperatures.                                                                                 | S5  |
| 4. Force curves obtained by SPM on single crystalline surfaces of <b>1o</b> , <b>3o</b> , and <b>4o</b> .                                                       | S6  |
| 5. Relation between temperatures and slope of force curves indicating the hardness of the surface obtained by SPM on single crystalline surfaces of <b>4o</b> . | S7  |
| 6. The XRD patterns of microcrystalline surfaces.                                                                                                               | S10 |

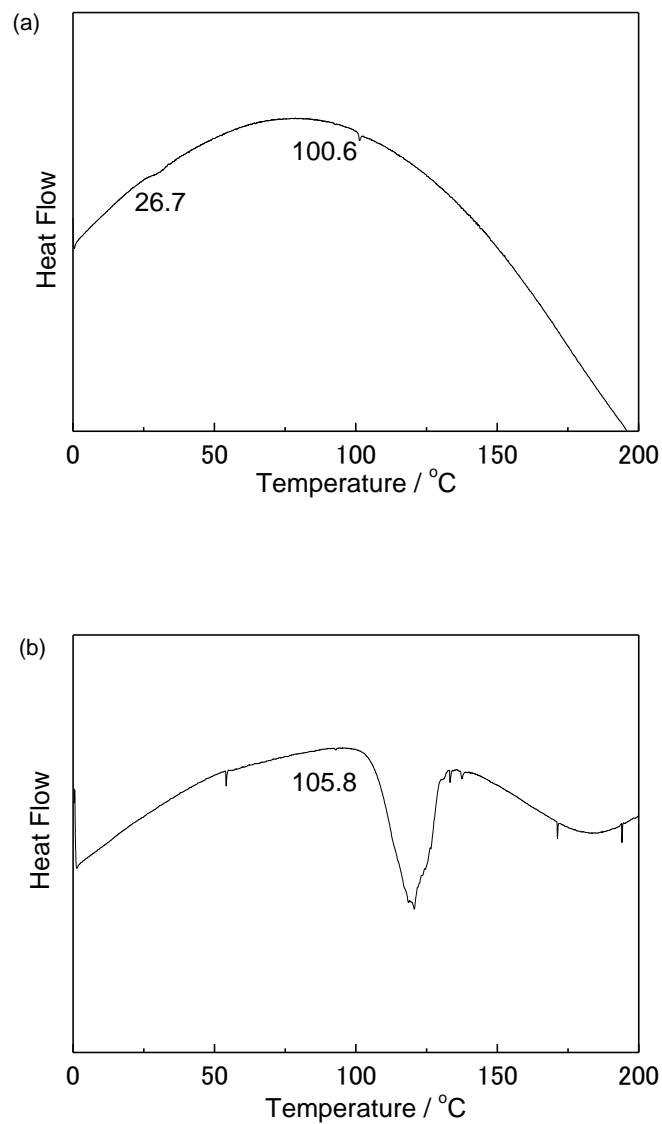

**Fig. S1.** DSC curves measured for the samples of (a) a mixture of **4o** and **4c** (**4o/4c** = 74.2/25.8) and (b) 100% of **4c** with heating rate of 5 °C/min. After DSC measurement the ratio of the **4c** was measured by absorption spectra, and found the contents were reduced from 25.8% to 10.5% for (a), and 100% to 17.1% for (b), respectively.

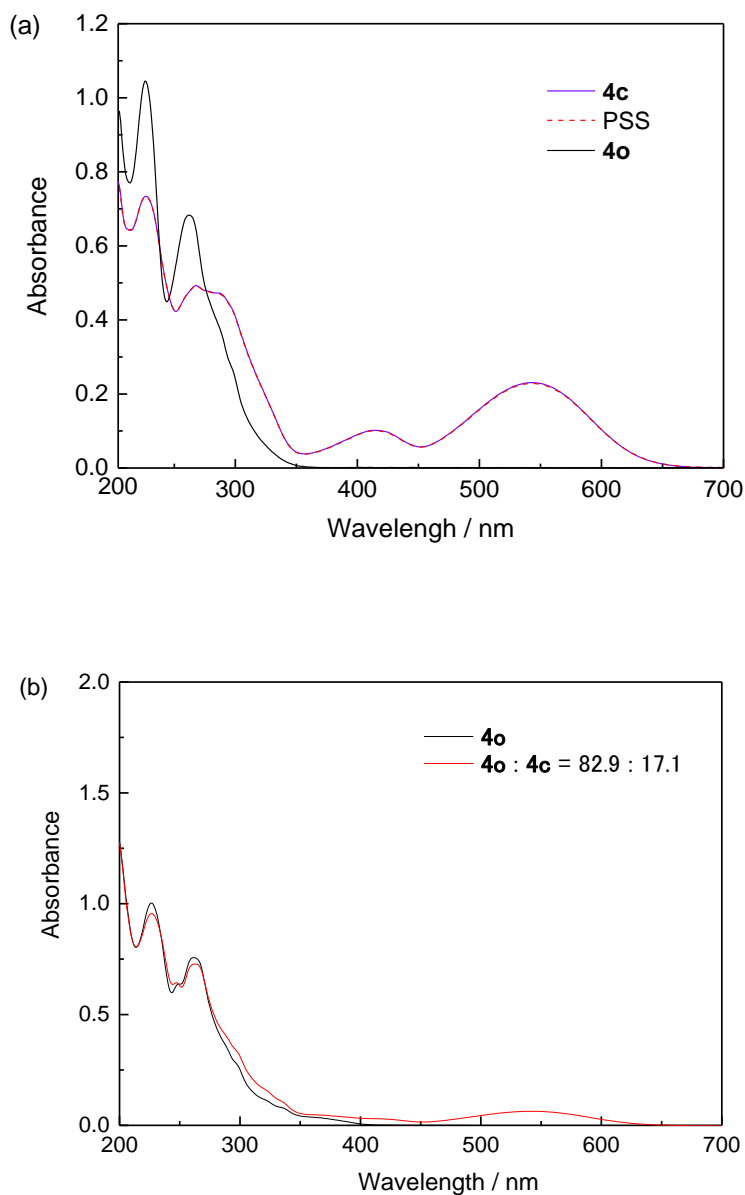

**Fig. S2.** (a) Absorption spectral changes of **4o** in hexane solution ( $3.55 \times 10^{-5}$  mol/L). **4o**: black solid line, **4c**: purple solid line, photostationary state (PSS) upon UV irradiation (**4o**:**4c**=1:99): red broken line.  $\lambda_{\max}$  of **4o**: 267 nm ( $\epsilon$ :  $2.24 \times 10^4$  M $^{-1}$ cm $^{-1}$ ),  $\lambda_{\max}$  of **4c**: 542 nm ( $\epsilon$ :  $1.11 \times 10^4$  M $^{-1}$ cm $^{-1}$ ), (b) Absorption spectrum of **4o-4c** mixture after measurement of DSC (red-line) and the spectrum of **4o** upon visible light irradiation (black line). New band around 370 nm indicating decomposition product.

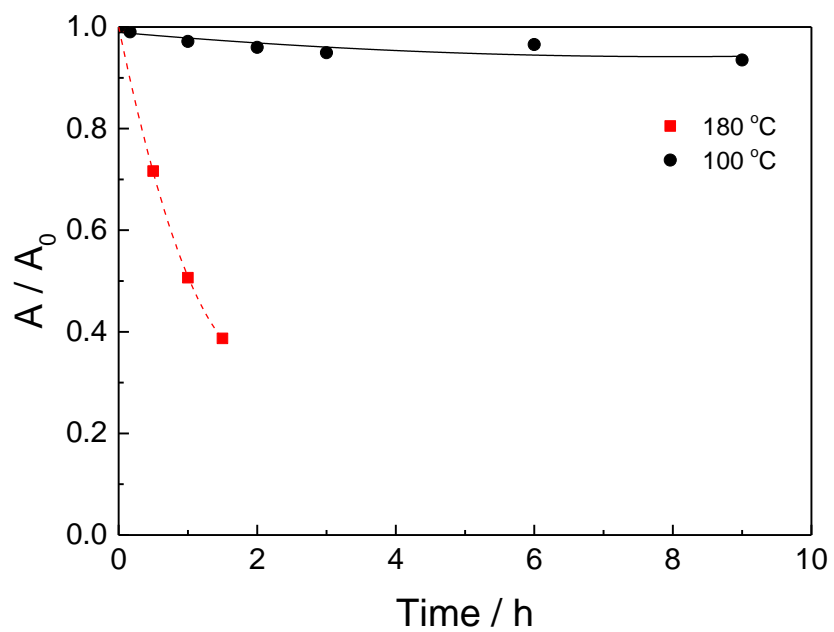

**Fig. S3.** Thermal stability of **4c** in decalin solution at elevated temperatures (monitored at 547 nm).

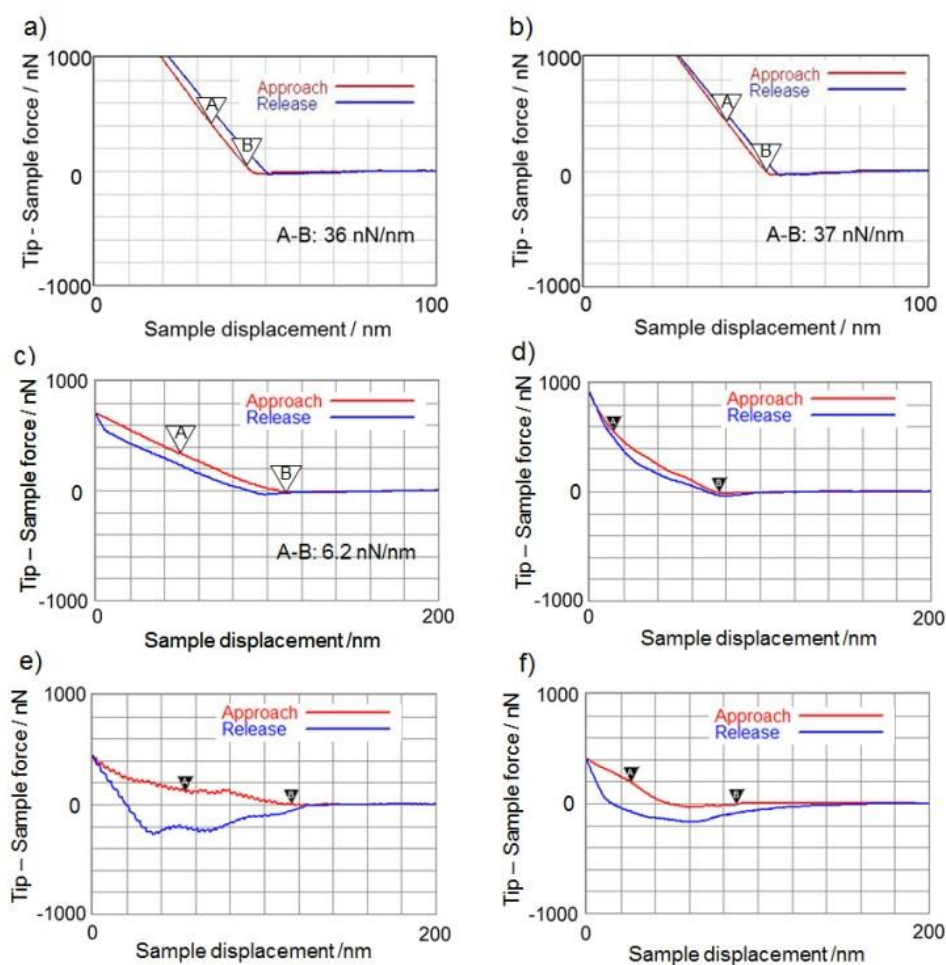

**Fig. S4.** Force curves obtained by SPM on single crystalline surfaces of **1o** ((a) before and (b) after irradiation with UV light at 22 °C. (c) before irradiation with UV light at 30 °C. (d) before irradiation with UV light at 50 °C. (e) before irradiation with UV light at 100 °C. (f) after irradiation with UV light at 30 °C.) Approach and release processes are depicted as red and blue lines, respectively. The speed of the approach and the release of the cantilever were both 100 nm/s. The spring constant was 42 N/m.

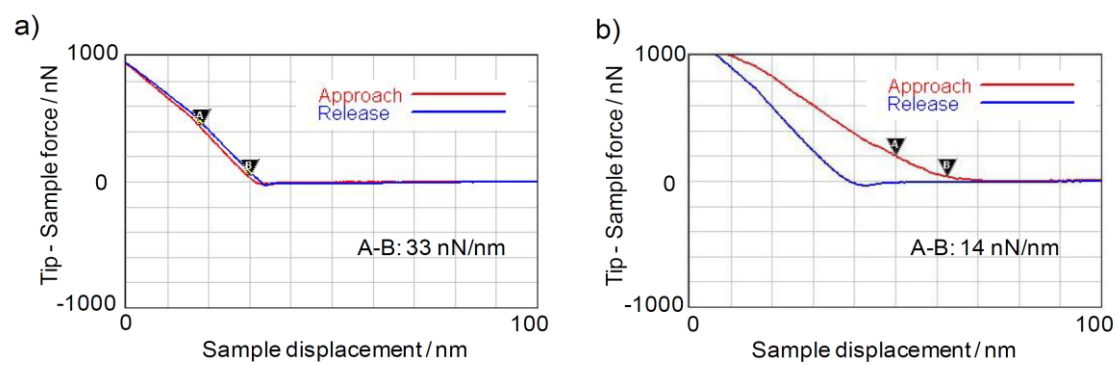

**Fig. S5.** Force curves obtained by SPM on single crystalline surfaces of **3o** at 30 °C ((a) before and (b) after UV irradiation).

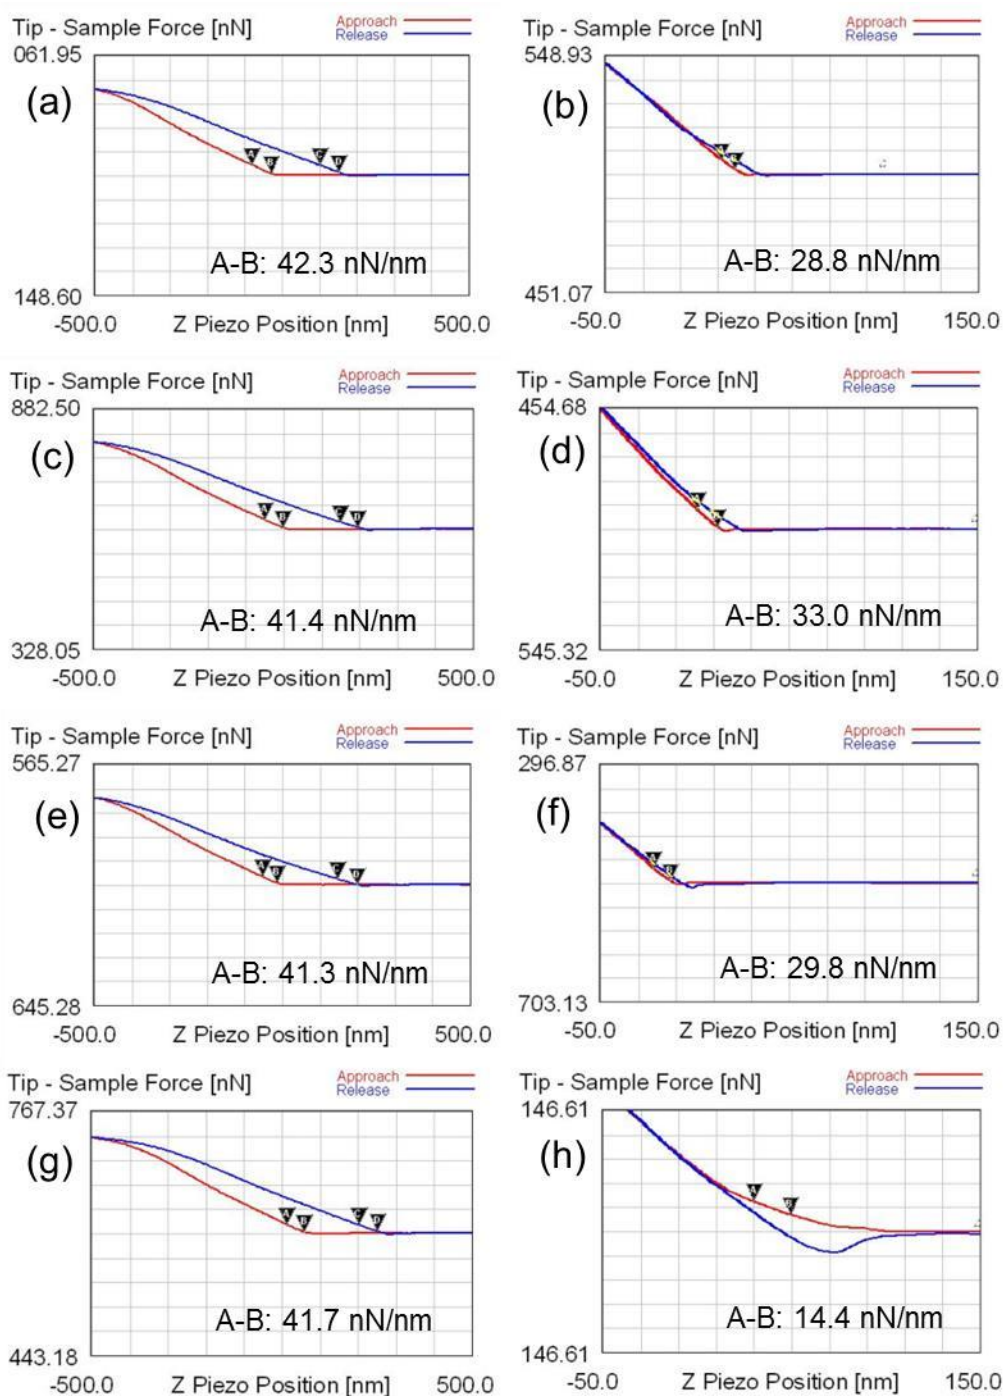

**Fig. S6.** Summary of the force curves (FC) obtained by SPM on single crystalline surfaces of **4o**. FCs were measured at 23 (a, b), 25 (c, d), 29 (e, f), and 50 °C (g, h). FCs before UV irradiation are shown in Figs. (a), (c), (e), (g), and FCs after UV irradiation are shown in Figs. (b), (d), (f), (h).



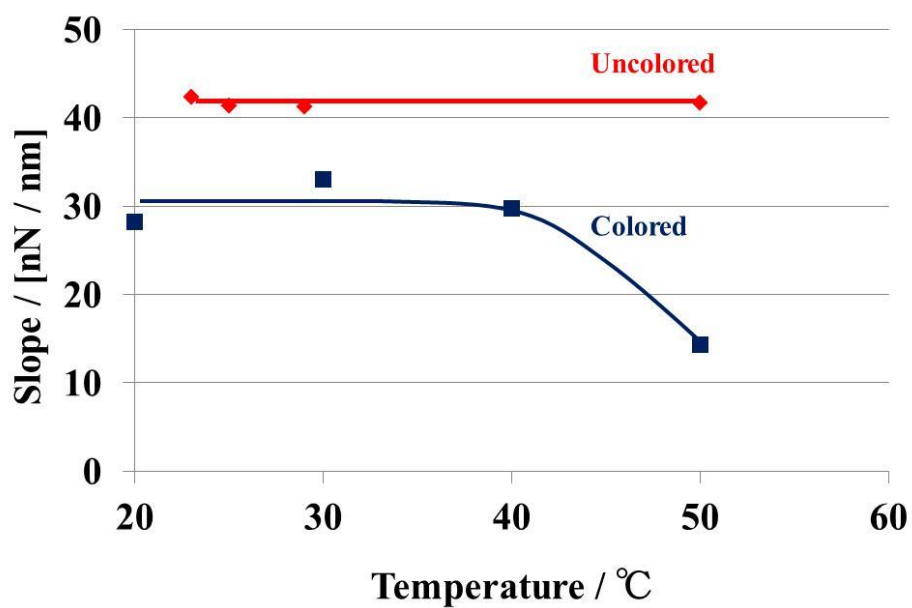

**Fig. S7.** Relation between temperatures and slope of force curves indicating the hardness of the surface obtained by SPM on single crystalline surfaces of **4o** ((a) before and (b) after UV irradiation).

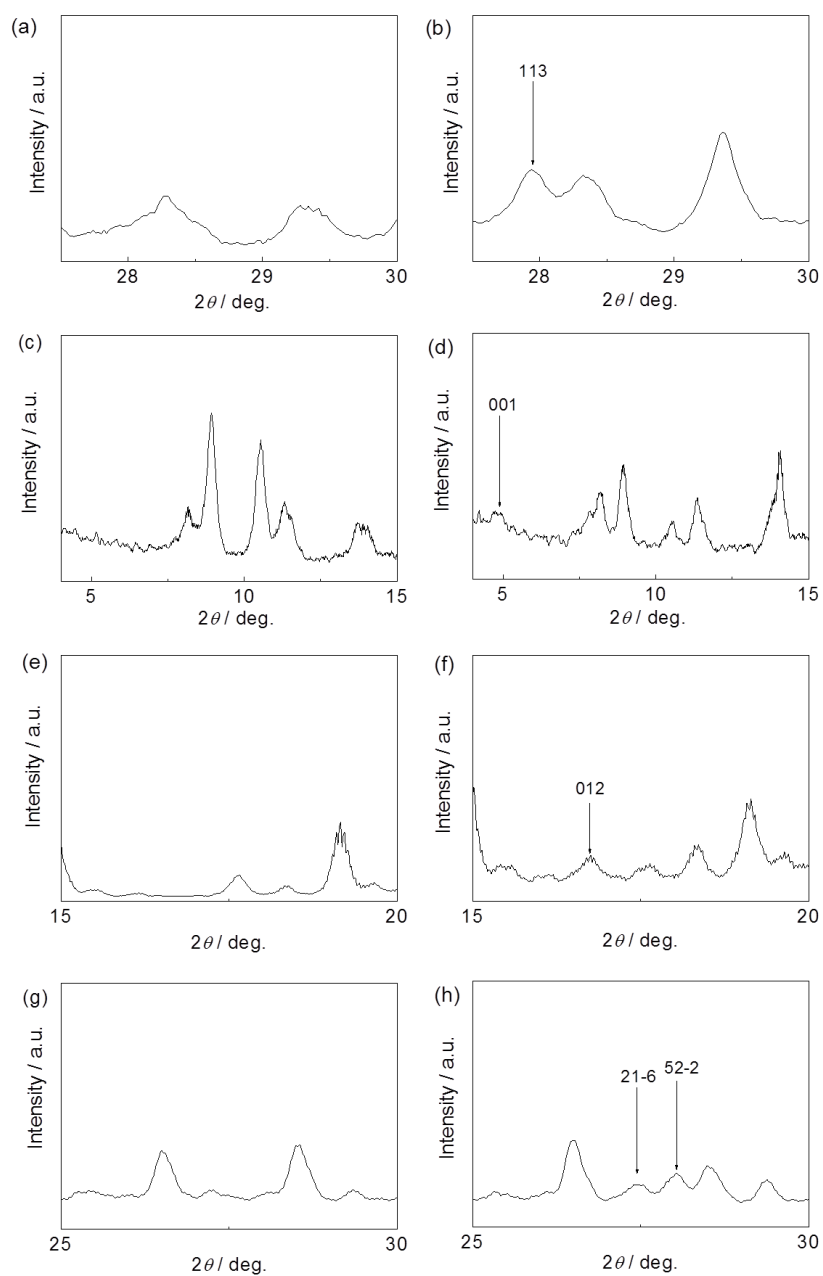

**Fig. S8.** The XRD patterns of microcrystalline surfaces of **1o**, **2o**, **3o** and **4o** (a, c, e, g), and microcrystalline surfaces storage at eutectic temperatures in the dark after UV irradiation (b, d, f, h). The diffraction peak at  $27.9^\circ$ , attributed to 113 diffraction of **1c** (b), the diffraction peak at  $5.00^\circ$ , attributed to 001 diffraction of **2c** (d), the diffraction peak at  $16.7^\circ$ , attributed to 012 diffraction of **3c** (f), the diffraction peaks at  $27.3^\circ$  and  $28.1^\circ$ , attributed to 21-6 and 52-2 diffractions of **4c** (h) were observed.
